# Supplementary material for: Can Early Rehabilitation Prevent Posttraumatic Osteoarthritis in the Patellofemoral Joint after Anterior Cruciate Ligament Rupture? Understanding the Pathological Features
Source: PubMed Central journal article supplement (PMC5412413; doi:10.3390/ijms18040829), 2017-04-14
Supplement: ijms-18-00829-s001.pdf [file ijms-18-00829-s001.pdf]

## Supplementary Materials: Can Early Rehabilitation Prevent Posttraumatic Osteoarthritis in the Patellofemoral Joint after Anterior Cruciate Ligament Rupture? Understanding the Pathological Features

Nai-Jen Chang, Ming-You Shie, Kuan-Wei Lee, Pei-Hsi Chou, Chih-Chan Lin and Chih-Jou Chu

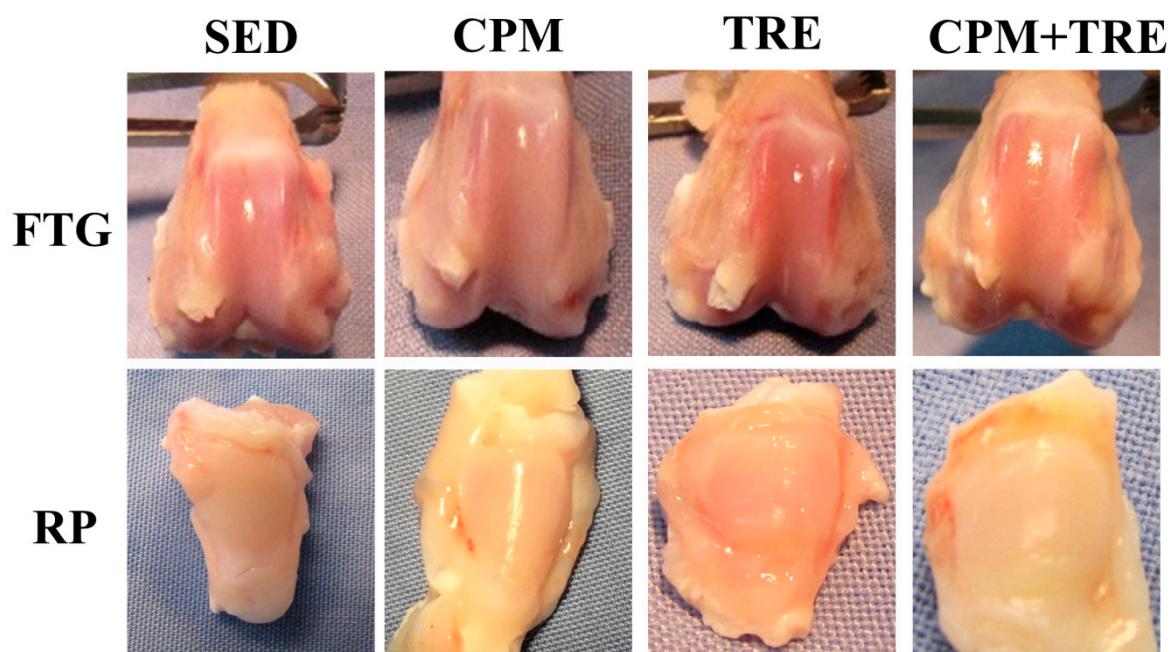

Figure S1. Evaluation of the gross appearance in the ACL transection (ACLT) knee.
